# Supplementary material for: Molecular mechanisms of genotype-dependent lifespan variation mediated by caloric restriction: insight from wild yeast isolates
Source: PubMed Central journal article supplement (PMC11269085; doi:10.3389/fragi.2024.1408160), 2024-07-11
Supplement: DataSheet1.pdf [file DataSheet1.pdf]

## **Supplementary Figures**

McLean et al., 2024:

Molecular Mechanisms of Genotype-Dependent Lifespan Variation Mediated by Caloric  
Restriction: Insight from Wild Yeast Isolates

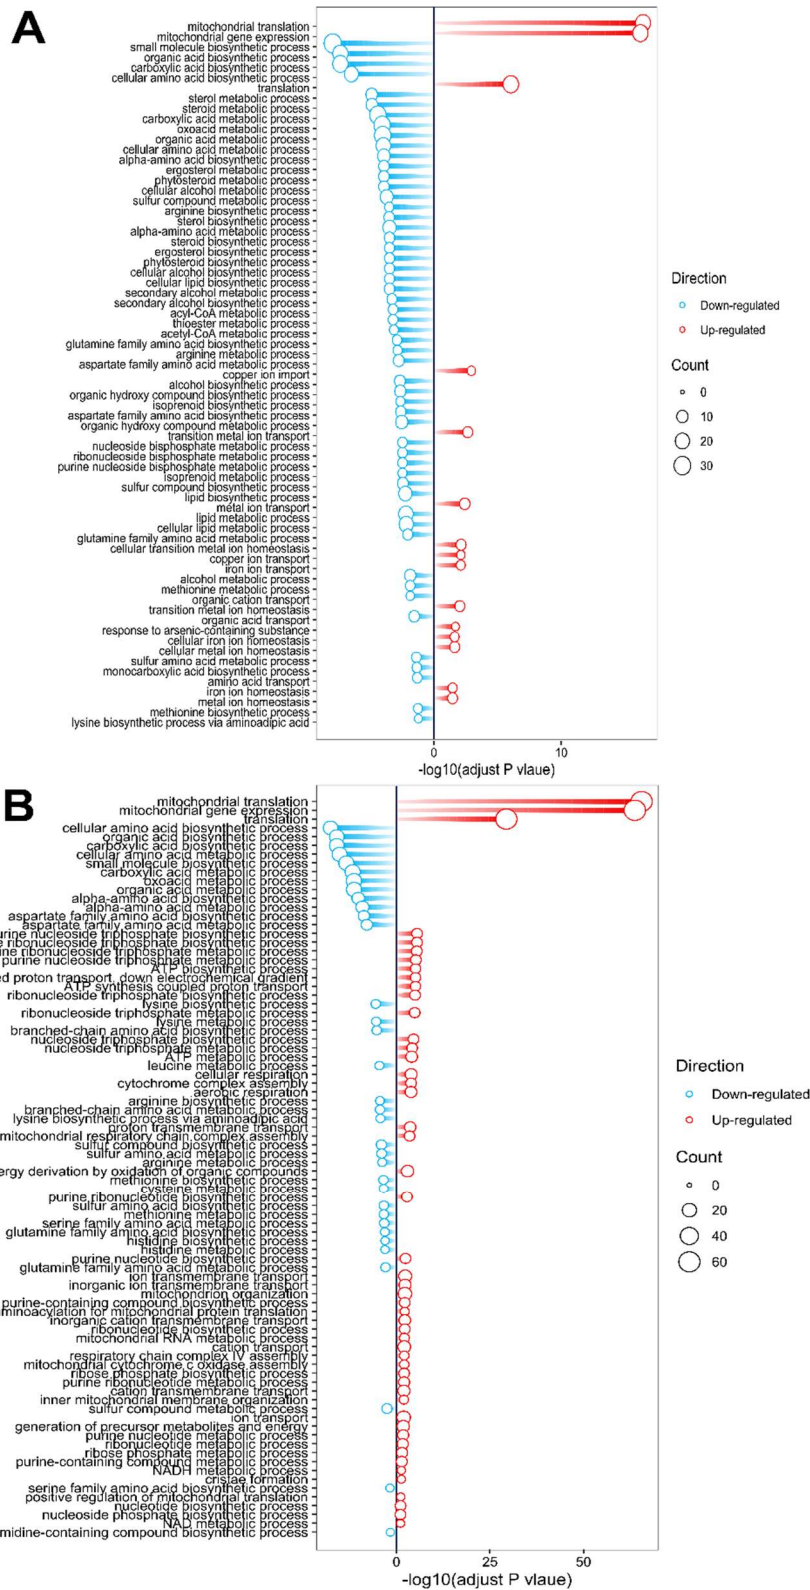

| A      |      | B     |      |
|--------|------|-------|------|
| MET32  | 91.9 | SFP1  | 83.2 |
| MSN2   | 36.6 | CST6  | 39.2 |
| MSN4   | 12.8 | GCR1  | 34.9 |
| AFT1   | 9.9  | HSF1  | 26   |
| HCM1   | 7.1  | RAP1  | 23.2 |
| GCN5   | 5.9  | SPT20 | 22   |
| MED2   | 5.6  | FHL1  | 12.8 |
| HAP4   | 5.4  | FKH2  | 12.5 |
| AFT2   | 4.9  | HFI1  | 4.9  |
| MET4   | 3.9  | SPT10 | 4.5  |
| RIM101 | 3.8  | REB1  | 3.3  |
| ZAP1   | 2.7  | URE2  | 2.1  |
| XBP1   | 2.6  | PIP2  | 2.1  |

Up-regulated                      Down-regulated

**Figure S2. Transcription factor enrichment analyses for non-responding strains analyzed under CR condition.** Significantly enriched TFs for (A) up- and (B) down-regulated DEGs obtained under CR conditions for non-responding strains. The color index and the number show the significance of the enrichment score ( $-\log_{10}$ , adjusted P-value).

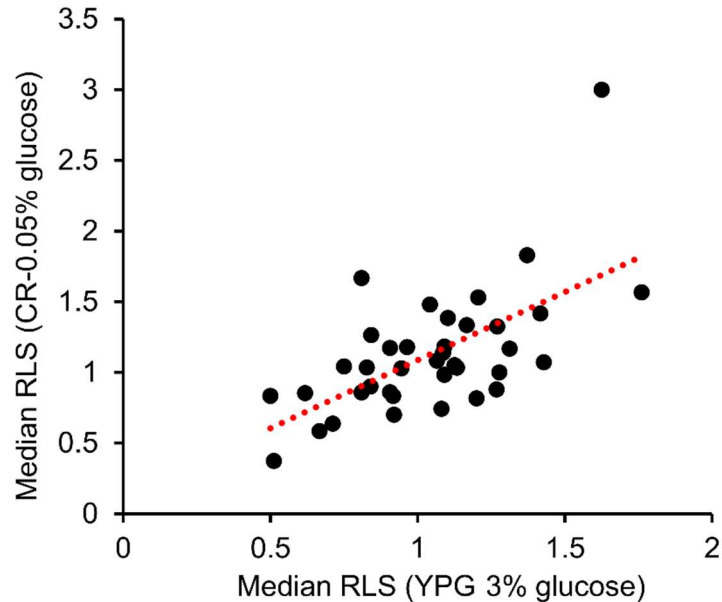

**Figure S3. A positive correlation of median RLS phenotype between YPG and CR medium was observed.** A significant correlation was observed between median RLS in YPG and median RLS in CR, wherein glycerol-induced CR-induced respiration approximately equally extends the RLS of those strains we tested ( $R^2 = 0.62$ ,  $P_{adj} \text{ value} = 2.29 \times 10^{-4}$ ).

#### Supplementary Files:

**Supplementary file 1:** The file includes the strain list used in this study and their replicative lifespan analyzed under YPD, YPG, and CR conditions, along with the statistical significance of lifespan differences.

**Supplementary File 2:** Differentially expressed genes and metabolite abundances resulted from comparison of responding (POS) versus non-responding (NON) and negatively (NEG) responding comparisons. These -omics data were obtained under YPD conditions. The file also contains results from the regression analysis for the genes and metabolites whose transcript level/abundances correlate with CR-lifespan. The file also includes results from the GO term enrichment analysis associated with Figures 9 and 10.

**Supplementary File 3:** The file includes raw and normalized counts for RNA-seq data for selected responding and non-responding strains. Differentially expressed genes for each group resulting from comparison to the control (YPD) are also included.
